# Supplementary material for: Design and performance evaluation of ionic liquid-based microwave-assisted simultaneous extraction of kaempferol and quercetin from Chinese medicinal plants
Source: Royal Society of Chemistry journal article supplement (doi:10.1039/c3ay40202a), 2013-01-01
Supplement: c3ay40202a.pdf [file c3ay40202a.pdf]

## Supplementary information

**Table S1** Chemical shifts of  $^1\text{H}$  NMR spectra for twenty kinds of ILs

| Ionic liquids <sup>a</sup> | $^1\text{H}$ NMR spectra ( $\delta$ , $\times 10^{-6}$ ) <sup>b</sup> |     |         |         |         |         |         |         |      |
|----------------------------|-----------------------------------------------------------------------|-----|---------|---------|---------|---------|---------|---------|------|
|                            | 2-H                                                                   | 3-H | 4-H     | 5-H     | 6-H     | 7-H     | 8-H     | 9-H     | 10-H |
| [Emim][Br]                 | 10.05                                                                 | –   | 7.58    | 7.69    | 2.98    | 4.34    | 1.51    |         |      |
|                            | (1H, s)                                                               |     | (1H, s) | (1H, s) | (3H, s) | (2H, q) | (3H, t) |         |      |
| [Emim][BF <sub>4</sub> ]   | 10.12                                                                 | –   | 7.41    | 7.54    | 4.07    | 4.30    | 1.47    |         |      |
|                            | (1H, s)                                                               |     | (1H, d) | (1H, d) | (3H, s) | (2H, q) | (3H, t) |         |      |
| [Amim][Cl]                 | 9.89                                                                  |     | 7.51    | 7.68    | 4.08    | 4.33    | 1.91    | 0.96    |      |
|                            | (1H, s)                                                               | –   | (1H, s) | (1H, s) | (3H, s) | (2H, q) | (2H, t) | (3H, t) |      |
| [Amim][BF <sub>4</sub> ]   | 9.25                                                                  |     | 7.41    | 7.34    | 3.86    | 4.96    | 6.07    | 5.45    |      |
|                            | (1H, s)                                                               | –   | (1H, d) | (1H, d) | (3H, m) | (2H, d) | (1H, m) | (1H, m) |      |
| [Pmim][Br]                 | 10.03                                                                 |     | 7.65    | 7.69    | 3.68    | 4.32    | 1.91    | 0.96    |      |
|                            | (1H, s)                                                               | –   | (1H, s) | (1H, s) | (3H, s) | (2H, q) | (2H, t) | (3H, t) |      |
| [Pmim][BF <sub>4</sub> ]   | 10.15                                                                 |     | 7.42    | 7.58    | 4.07    | 4.29    | 1.95    | 0.98    |      |
|                            | (1H, s)                                                               | –   | (1H, s) | (1H, s) | (3H, s) | (2H, t) | (2H, m) | (3H, t) |      |

|                           |         |   |         |         |         |         |         |         |         |
|---------------------------|---------|---|---------|---------|---------|---------|---------|---------|---------|
| [Bmim][Br]                | 10.06   | – | 7.61    | 7.72    | 3.02    | 4.35    | 1.91    | 1.38    | 0.96    |
|                           | (1H, s) |   | (1H, d) | (1H, s) | (3H, s) | (2H, t) | (2H, m) | (2H, q) | (3H, t) |
| [Bmim][Cl]                | 10.17   | – | 7.51    | 7.66    | 4.11    | 4.35    | 1.87    | 1.38    | 0.95    |
|                           | (1H, s) |   | (1H, d) | (1H, s) | (3H, s) | (2H, t) | (2H, m) | (2H, q) | (3H, t) |
| [Bmim][BF <sub>4</sub> ]  | 10.09   | – | 7.43    | 7.59    | 4.07    | 4.32    | 1.89    | 1.36    | 0.96    |
|                           | (1H, s) |   | (1H, d) | (1H, s) | (3H, s) | (2H, t) | (2H, m) | (2H, q) | (3H, t) |
| [Bmim][HSO <sub>4</sub> ] | 10.12   | – | 7.38    | 7.54    | 4.13    | 4.34    | 1.93    | 1.31    | 0.92    |
|                           | (1H, s) |   | (1H, d) | (1H, s) | (3H, s) | (2H, t) | (2H, m) | (2H, q) | (3H, t) |
| [Bmim][OTM]               | 10.02   | – | 7.44    | 7.48    | 4.14    | 4.27    | 1.87    | 1.22    | 0.91    |
|                           | (1H, s) |   | (1H, d) | (1H, s) | (3H, s) | (2H, t) | (2H, m) | (2H, t) | (3H, t) |
| [Bmim][PTSA]              | 10.16   | – | 7.44    | 7.56    | 4.08    | 4.29    | 1.86    | 1.33    | 0.93    |
|                           | (1H, s) |   | (1H, d) | (1H, s) | (3H, s) | (2H, t) | (2H, m) | (2H, q) | (3H, t) |
| [Hmim][Br]                | 9.92    | – | 7.73    | 7.67    | 3.04    | 4.31    | 1.88    | 1.34    | 0.92    |
|                           | (1H, s) |   | (1H, d) | (1H, d) | (3H, d) | (2H, t) | (2H, m) | (2H, m) | (2H, m) |
| [Hmim][BF <sub>4</sub> ]  | 9.94    | – | 7.54    | 7.71    | 4.11    | 4.34    | 2.02    | 1.34    | 1.31    |
|                           | (1H, s) |   | (1H, d) | (1H, d) | (3H, d) | (2H, t) | (2H, m) | (2H, m) | (2H, m) |

|                           |             |             |             |             |             |             |         |         |         |
|---------------------------|-------------|-------------|-------------|-------------|-------------|-------------|---------|---------|---------|
| [Omim][Br]                | 10.14       | –           | 7.77        | 7.69        | 3.08        | 4.37        | 1.78    | 1.28    | 0.93    |
|                           | (1H, s)     |             | (1H, s)     | (1H, s)     | (3H, m)     | (2H, m)     | (2H, m) | (2H, m) | (2H, m) |
| [Omim][BF <sub>4</sub> ]  | 10.17       | –           | 7.55        | 7.72        | 4.15        | 4.36        | 1.93    | 1.27    | 1.25    |
|                           | (1H, s)     |             | (1H, s)     | (1H, s)     | (3H, m)     | (2H, m)     | (2H, m) | (2H, m) | (2H, m) |
| [Demim][Br]               | 10.24       | –           | 7.65        | 7.52        | 3.04        | 4.32        | 1.72    | 1.26    | 0.94    |
|                           | (1H, s)     |             | (1H, d)     | (1H, d)     | (3H, s)     | (2H, t)     | (2H, m) | (2H, m) | (2H, m) |
| [Demim][BF <sub>4</sub> ] | 10.27       | –           | 7.43        | 7.59        | 4.11        | 4.33        | 1.87    | 1.27    | 1.25    |
|                           | (1H, s)     |             | (1H, d)     | (1H, d)     | (3H, s)     | (2H, t)     | (2H, m) | (2H, m) | (2H, m) |
| [Bpy][Br]                 | 9.51        | 8.14        | 8.72        | 8.14        | 9.47        | 4.52        | 2.01    | 1.45    | 0.84    |
|                           | (1H, d)     | (1H, d)     | (1H, m)     | (1H, d)     | (1H, d)     | (2H, t)     | (2H, m) | (2H, m) | (3H, t) |
| [Bpy][BF <sub>4</sub> ]   | 9.54        | 8.21        | 8.56        | 8.21        | 9.52        | 4.51        | 2.04    | 1.44    | 0.94    |
|                           | (1H, d)     | (1H, d)     | (1H, m)     | (1H, d)     | (1H, d)     | (2H, t)     | (2H, m) | (2H, m) | (3H, t) |
|                           | <b>11-H</b> | <b>12-H</b> | <b>13-H</b> | <b>14-H</b> | <b>15-H</b> | <b>16-H</b> |         |         |         |
| [Hmim][Br]                | 1.84        | 0.82        |             |             |             |             |         |         |         |
|                           | (2H, m)     | (3H, t)     |             |             |             |             |         |         |         |
| [Hmim][BF <sub>4</sub> ]  | 1.92        | 0.89        |             |             |             |             |         |         |         |

|   |                           |         |         |         |         |         |         |
|---|---------------------------|---------|---------|---------|---------|---------|---------|
| a |                           | (2H, m) | (3H, t) |         |         |         |         |
|   | [Omim][Br]                | 1.18    | 1.18    | 1.29    | 0.86    |         |         |
|   |                           | (2H, m) | (2H, m) | (2H, m) | (3H, t) |         |         |
|   | [Omim][BF <sub>4</sub> ]  | 1.28    | 1.28    | 1.35    | 0.87    |         |         |
|   |                           | (2H, m) | (2H, m) | (2H, m) | (3H, t) |         |         |
|   | [Demim][Br]               | 1.18    | 1.15    | 1.27    | 1.26    | 1.38    | 0.83    |
|   |                           | (2H, m) | (3H, t) |
|   | [Demim][BF <sub>4</sub> ] | 1.26    | 1.26    | 1.34    | 1.24    | 1.35    | 0.87    |
|   |                           | (2H, m) | (3H, t) |

---

Twenty kinds of ILs were all dissolved in CDCl<sub>3</sub> and recorded on Varian-INOVA 400 NMR spectrometry.

<sup>b</sup> <sup>1</sup>H NMR chemical shifts were recorded at 100MHz and reported downfield from trimethylsilane (TMS). Multiplicities are abbreviated as s=singlet, d=doublet, q=quartet, t=triplet and m=multiplet.

**Table S2** Chemical shifts of  $^{13}\text{C}$  NMR spectra for twenty kinds of ILs

| Ionic liquids <sup>a</sup> | $^{13}\text{C}$ NMR spectra ( $\delta, \times 10^{-6}$ ) <sup>b</sup> |     |        |        |       |       |        |        |       |       |       |      |      |      |      |
|----------------------------|-----------------------------------------------------------------------|-----|--------|--------|-------|-------|--------|--------|-------|-------|-------|------|------|------|------|
|                            | 2-C                                                                   | 3-C | 4-C    | 5-C    | 6-C   | 7-C   | 8-C    | 9-C    | 10-C  | 11-C  | 12-C  | 13-C | 14-C | 15-C | 16-C |
| [Emim][Br]                 | 137.13                                                                | -   | 121.86 | 123.57 | 36.54 | 48.35 | 13.43  |        |       |       |       |      |      |      |      |
| [Emim][BF <sub>4</sub> ]   | 137.12                                                                | -   | 121.88 | 123.54 | 36.47 | 48.33 | 13.42  |        |       |       |       |      |      |      |      |
| [Amim][Cl]                 | 138.07                                                                | -   | 121.96 | 123.64 | 36.74 | 53.11 | 133.11 | 115.54 |       |       |       |      |      |      |      |
| [Amim][BF <sub>4</sub> ]   | 138.06                                                                | -   | 121.97 | 123.62 | 36.66 | 53.13 | 133.09 | 115.51 |       |       |       |      |      |      |      |
| [Pmim][Br]                 | 137.19                                                                | -   | 121.85 | 123.57 | 36.68 | 49.72 | 21.01  | 13.49  |       |       |       |      |      |      |      |
| [Pmim][BF <sub>4</sub> ]   | 137.14                                                                | -   | 121.87 | 123.56 | 36.64 | 49.68 | 21.01  | 13.46  |       |       |       |      |      |      |      |
| [Bmim][Br]                 | 137.05                                                                | -   | 121.93 | 123.57 | 36.63 | 49.69 | 32.00  | 19.30  | 13.32 |       |       |      |      |      |      |
| [Bmim][Cl]                 | 137.28                                                                | -   | 121.79 | 123.53 | 36.34 | 49.47 | 31.91  | 19.20  | 13.23 |       |       |      |      |      |      |
| [Bmim][BF <sub>4</sub> ]   | 137.02                                                                | -   | 121.95 | 123.56 | 36.56 | 49.67 | 31.98  | 19.28  | 13.29 |       |       |      |      |      |      |
| [Bmim][HSO <sub>4</sub> ]  | 137.12                                                                | -   | 121.77 | 123.44 | 36.52 | 49.56 | 31.93  | 19.23  | 13.24 |       |       |      |      |      |      |
| [Bmim][OTM]                | 137.22                                                                | -   | 121.85 | 123.56 | 36.60 | 49.68 | 32.00  | 19.30  | 13.33 |       |       |      |      |      |      |
| [Bmim][PTSA]               | 137.16                                                                | -   | 121.90 | 123.54 | 36.58 | 49.68 | 32.01  | 19.31  | 13.34 |       |       |      |      |      |      |
| [Hmim][Br]                 | 136.55                                                                | -   | 121.75 | 123.58 | 36.47 | 49.72 | 29.88  | 25.51  | 30.73 | 22.01 | 13.59 |      |      |      |      |

|                           |        |        |        |        |        |       |       |       |       |       |       |       |       |       |       |
|---------------------------|--------|--------|--------|--------|--------|-------|-------|-------|-------|-------|-------|-------|-------|-------|-------|
| [Hmim][BF <sub>4</sub> ]  | 136.52 | -      | 121.79 | 123.57 | 36.38  | 49.68 | 29.86 | 25.47 | 30.71 | 22.00 | 13.58 |       |       |       |       |
| [Omim][Br]                | 136.79 | -      | 121.78 | 123.59 | 36.49  | 49.80 | 29.99 | 25.91 | 28.69 | 28.61 | 31.33 | 22.22 | 13.74 |       |       |
| [Omim][BF <sub>4</sub> ]  | 136.77 | -      | 121.80 | 123.56 | 36.40  | 49.78 | 29.97 | 25.88 | 28.67 | 28.60 | 31.32 | 22.24 | 13.73 |       |       |
| [Demim][Br]               | 137.33 | -      | 121.74 | 123.58 | 36.72  | 50.09 | 30.22 | 26.17 | 30.23 | 29.12 | 29.34 | 28.88 | 37.68 | 22.54 | 13.98 |
| [Demim][BF <sub>4</sub> ] | 137.30 | -      | 121.78 | 123.55 | 36.64  | 50.06 | 30.17 | 26.13 | 30.17 | 29.10 | 29.32 | 28.85 | 31.71 | 22.51 | 13.97 |
| [Bpy][Br]                 | 145.17 | 128.41 | 145.01 | 128.44 | 145.22 | 61.68 | 33.71 | 19.22 | 13.44 |       |       |       |       |       |       |
| [Bpy][BF <sub>4</sub> ]   | 145.14 | 128.43 | 145.03 | 128.41 | 145.14 | 61.65 | 33.67 | 19.18 | 13.40 |       |       |       |       |       |       |

---

<sup>a</sup> Twenty kinds of ILs were all dissolved in CDCl<sub>3</sub> and recorded on Varian-INOVA 400 NMR spectrometry.

<sup>b</sup> <sup>13</sup>C NMR chemical shifts were recorded at 400MHz and reported downfield from trimethylsilane (TMS)

**Fig.S1**

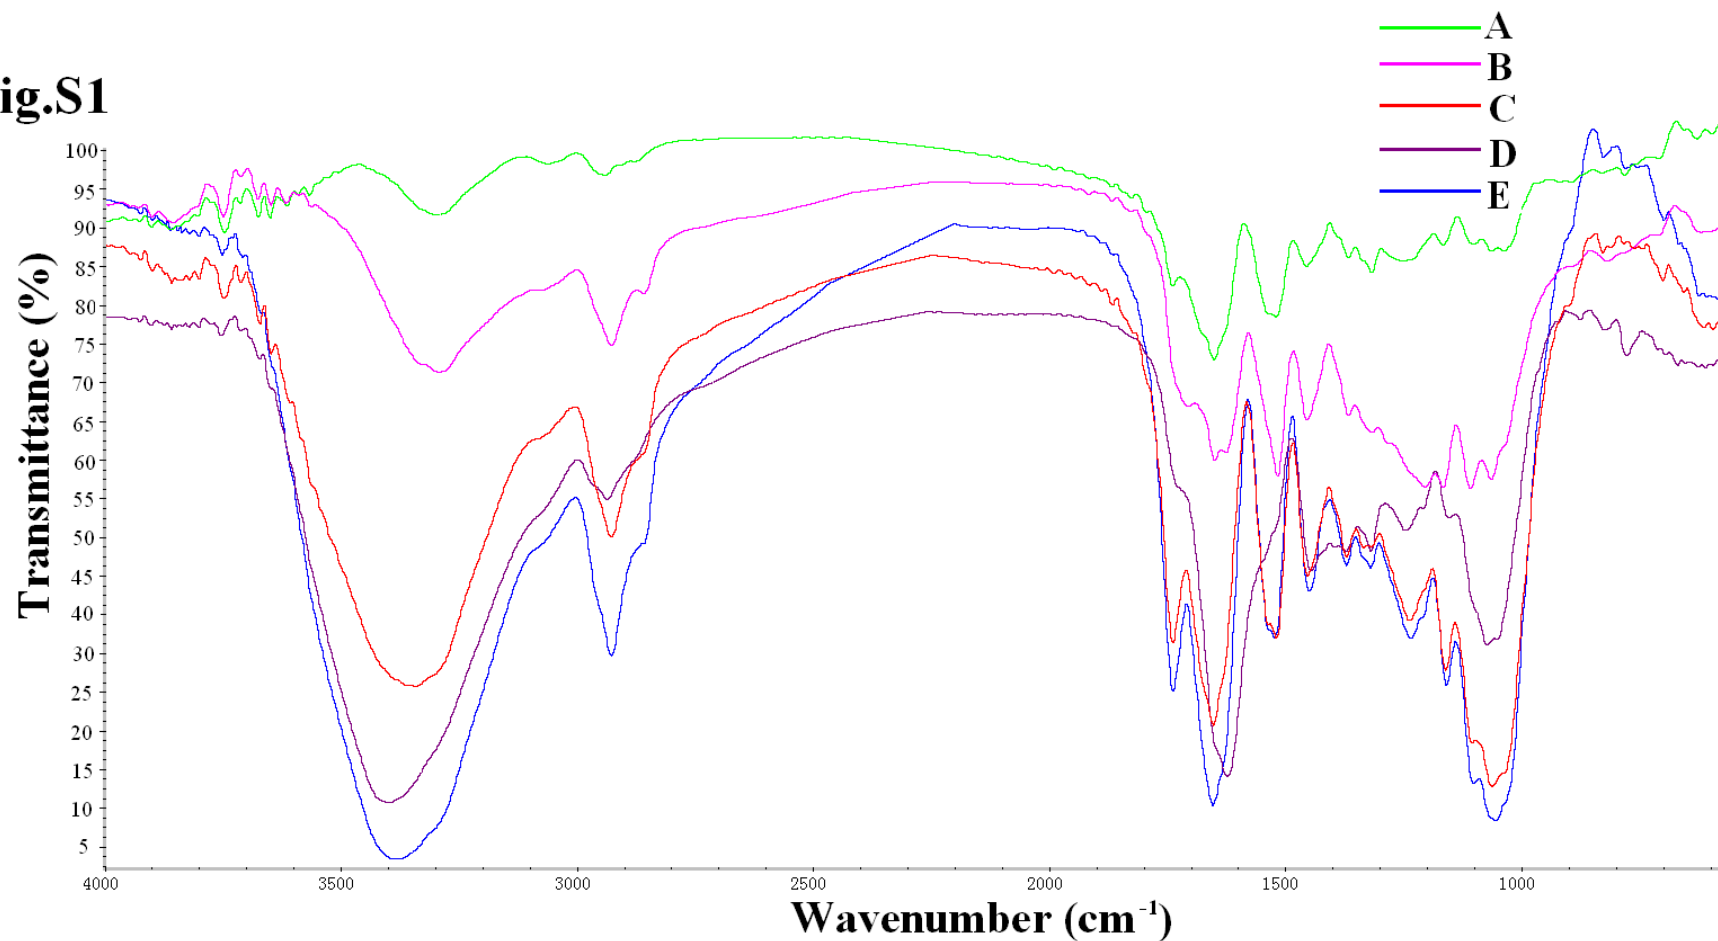

Fig. S1. FT-IR spectra of *Toona sinensis* samples before and after different extraction techniques. The FT-IR spectrograms of: (A) untreated, (B) after ME for 24 h, (C) after HE for 4 h, (D) after **UAE** for 2 h, (E) after **MAE** for 20 min.

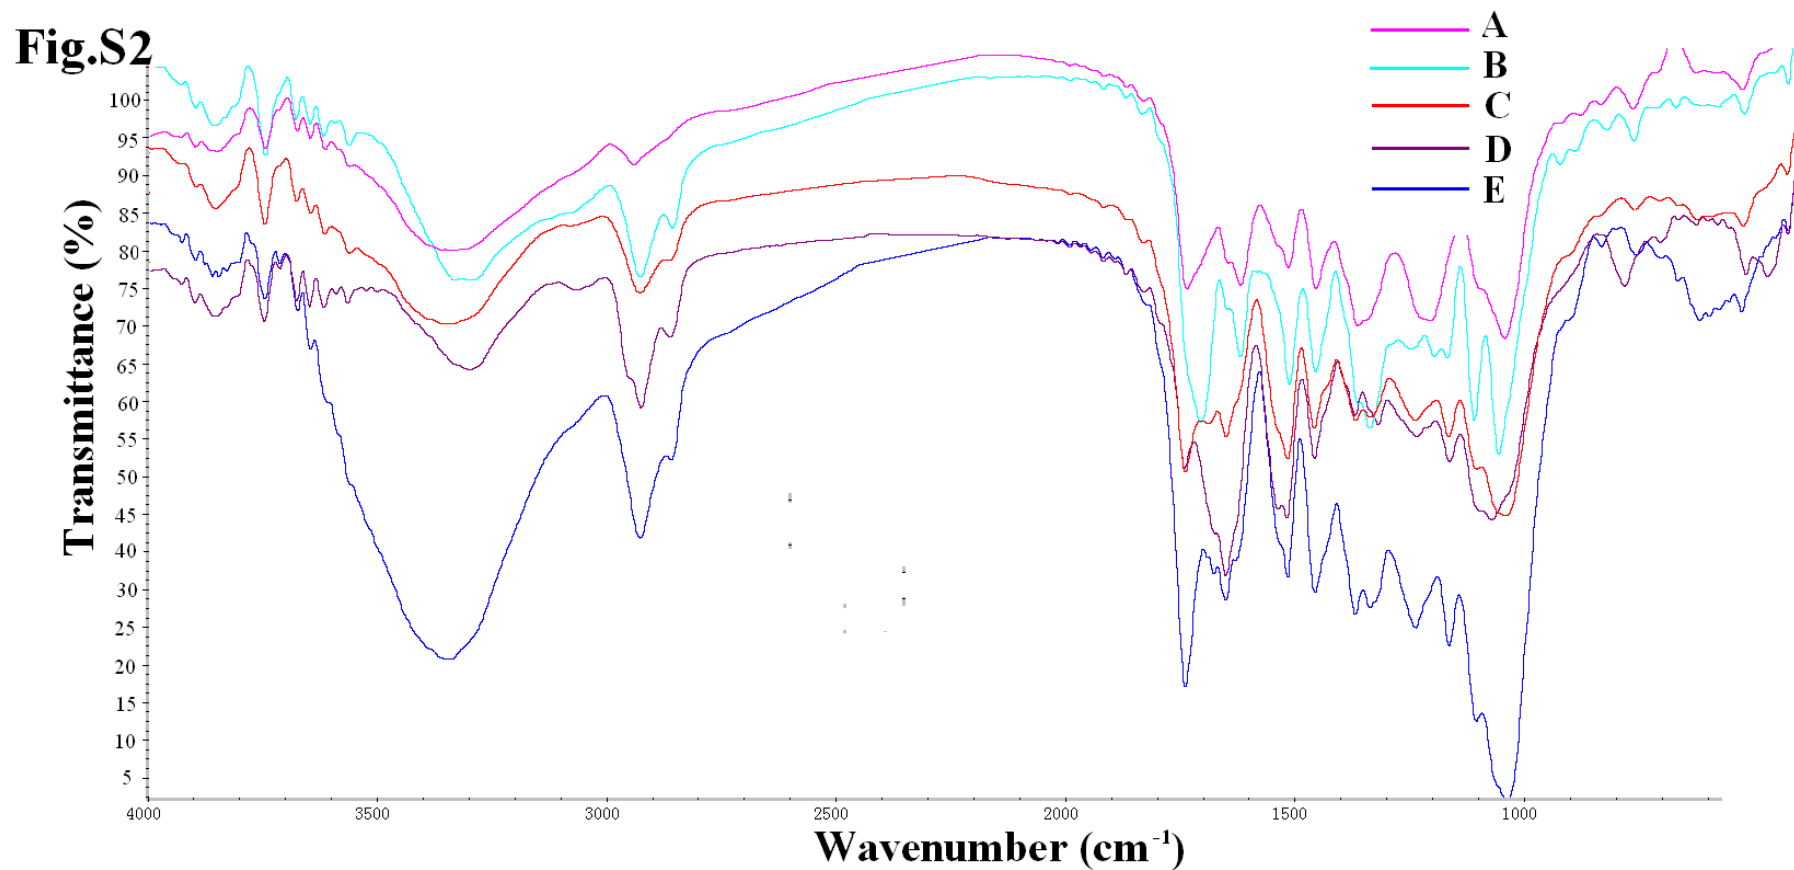

Fig. S2. FT-IR spectra of *Rosa chinensis* samples before and after different extraction techniques. The FT-IR spectrograms of: (A) untreated, (B) after ME for 24 h, (C) after HE for 4 h, (D) after UAE for 2 h, (E) after MAE for 20 min.



Fig. S3

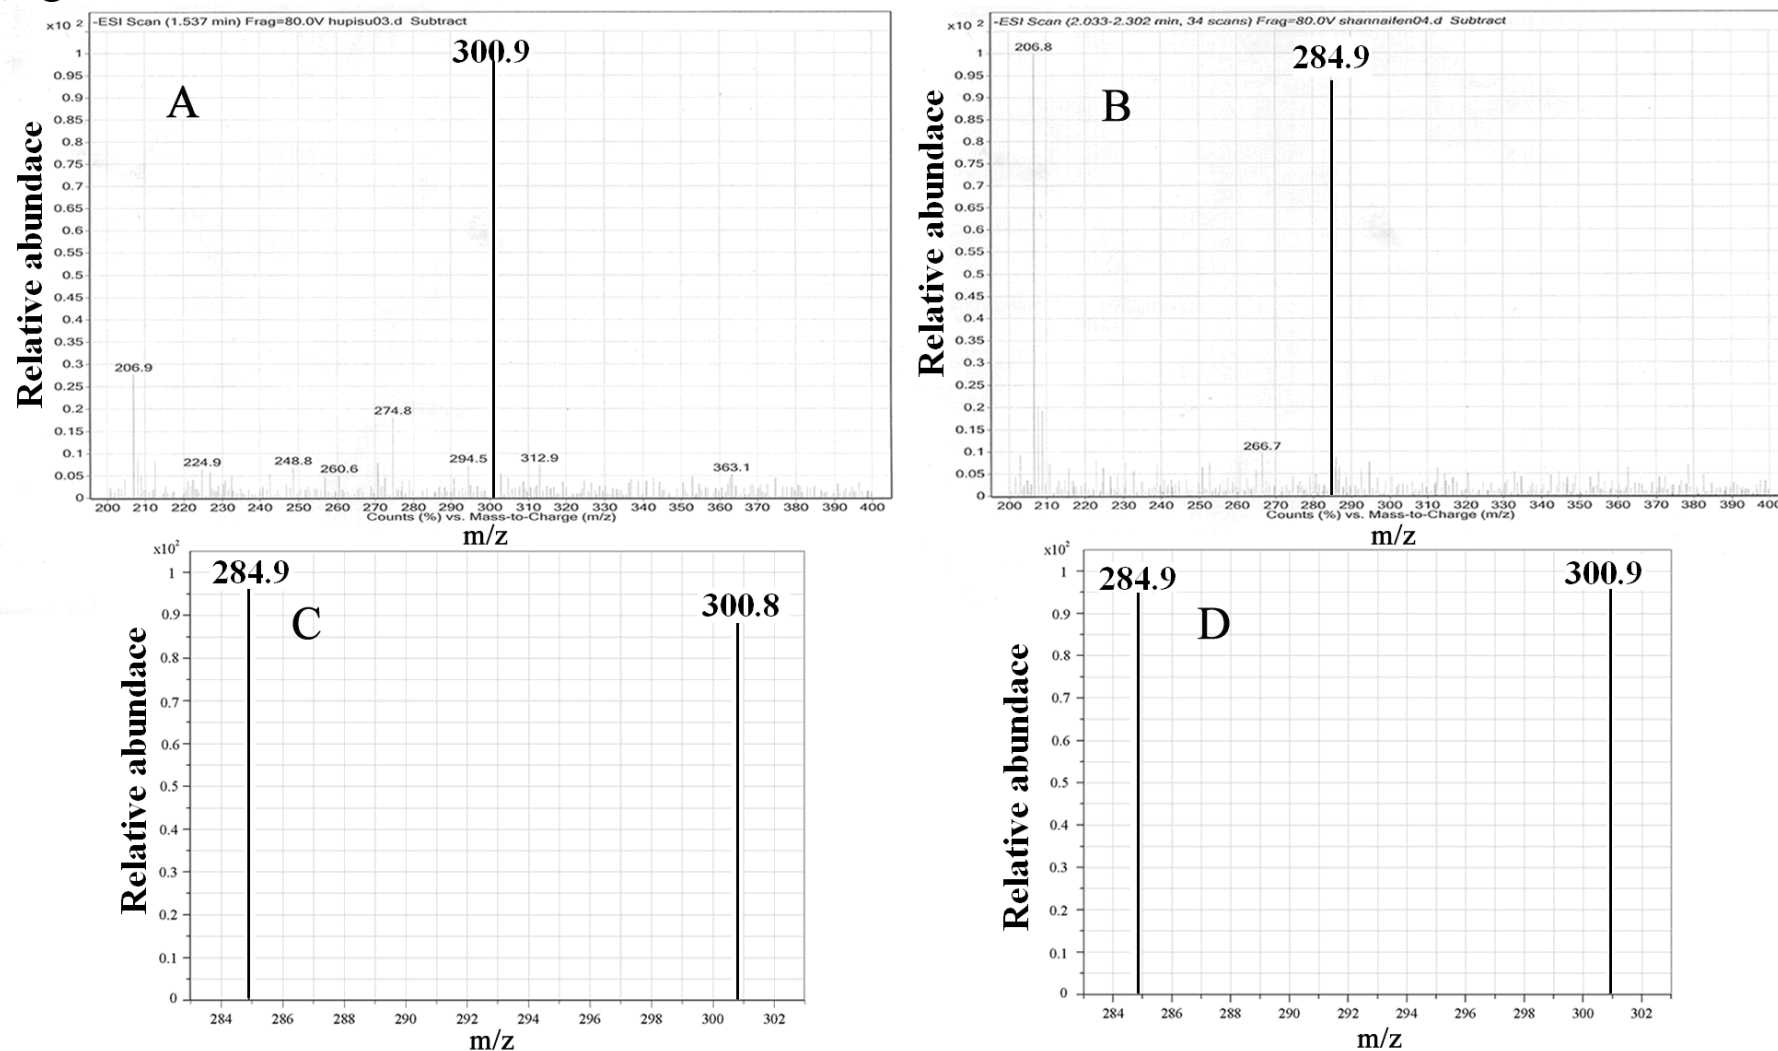

Fig. S3. Negative ion mass spectrums of quercetin standard solution (A), kaempferol standard solution (B), extracted *Toona sinensis* sample (C) and extracted *Rosa chinensis* sample (D), respectively.
